# Supplementary material
Source: Springer Nature journal article supplement (https://www.springermedizin.de/resource/supplementary/12876_2006_6_MOESM5_ESM.pdf/9438984)

Begg's funnel plot with pseudo 95% confidence limits

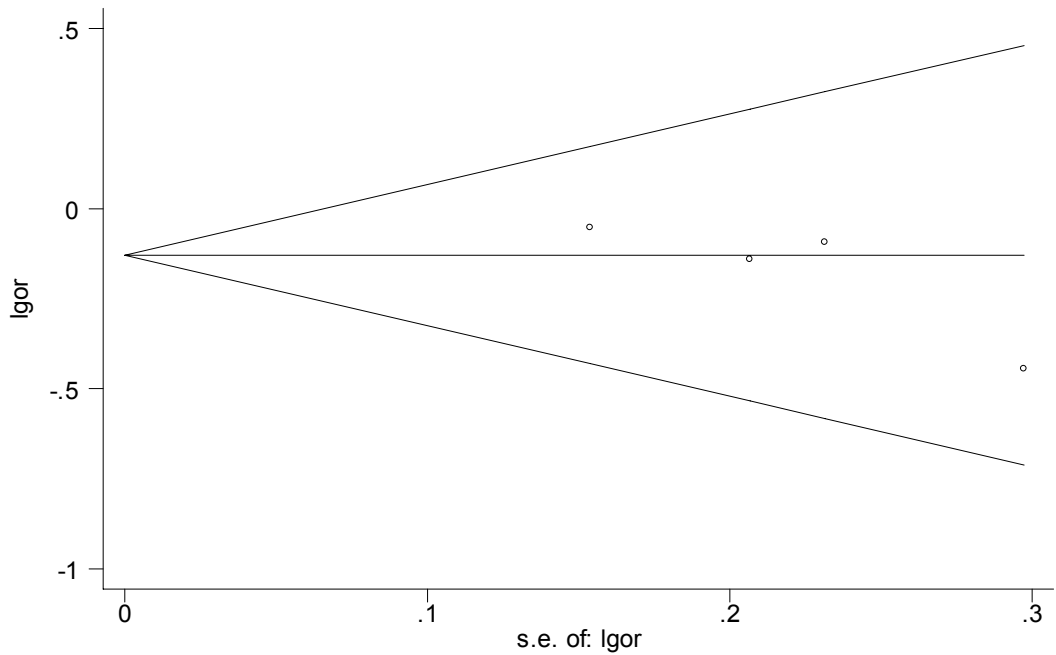

Supplement: MOESM5 [file 9438984]
